# Supplementary material for: The Human Skin Volatolome: A Systematic Review of Untargeted Mass Spectrometry Analysis
Source: MDPI journal article supplement (doi:10.3390/metabo12090824), 2022-09-01

# Supplementary File S1

## Developing the search strategy

The search strategy was required to capture volatile organic compounds emanating from the human skin of adult participants using untargeted mass spectrometry methods. Review articles, conference abstracts, and animal and cell studies were excluded. The search strategy took account of the variability in the way authors describe their research and indexers index research with Medical Subject Headings (MeSH). All variations in spelling including truncated search terms using wild card characters and the “related articles” function were used in combination with the Boolean operators AND OR. Abbreviations and search terms are explained in Box 1

### Box 1

|      |                                                                                                                                             |
|------|---------------------------------------------------------------------------------------------------------------------------------------------|
| Exp  | Explodes a MeSH to capture more specific MeSH.                                                                                              |
| /    | Indicates that the search term is a Medical Subject Heading (MeSH).                                                                         |
| AND  | Achieves a Boolean AND Combination.                                                                                                         |
| OR   | Achieves a Boolean OR Combination.                                                                                                          |
| .mp. | Searches for the term expressed in the title, original title, abstract, and subject heading.                                                |
| *    | Truncation operator, searches for words beginning with the stem, e.g. epidemiol* retrieves epidemiology, epidemiological and epidemiologic. |

The following databases were searched:

- Ovid MEDLINE (R) 1946 to 2022 June 05;
- Ovid Embase 1974 to 2022 June 05;
- Cochrane library from inception to 2022 June 05

Records identified from each electronic and regional database were downloaded into a separate Endnote bibliographic database, which were then combined to generate a single large Endnote bibliography containing all the records identified from all the databases in which duplicate records were removed.

## Final search strategy

The final search strategy and results for the MEDLINE search is shown below:

### Medline search

Embase Classic+Embase <1947 to 2022 June 05>

| Number | Search Strategy | Number of articles |
|--------|-----------------|--------------------|
|--------|-----------------|--------------------|

|   |                                                                                                                                   |          |
|---|-----------------------------------------------------------------------------------------------------------------------------------|----------|
| 1 | exp Human Experimentation/ or exp Humans/ or human experiment.mp. or exp Adult/                                                   | 25626797 |
| 2 | skin.mp. or exp Skin/                                                                                                             | 1450023  |
| 3 | volatile organic compound.mp. or exp Volatile Organic Compounds/                                                                  | 22737    |
| 4 | exp Gas Chromatography-Mass Spectrometry/ or exp Volatile Organic Compounds/ or volatile compound.mp. or exp Chromatography, Gas/ | 183808   |
| 5 | 3 or 4                                                                                                                            | 184367   |
| 6 | 2 and 5                                                                                                                           | 3903     |
| 7 | exp Adult/ or adult.mp.                                                                                                           | 10819640 |
| 8 | 1 and 6 and 7                                                                                                                     | 749      |

## Supplementary File S2

**Table S2a.** Quality assessment with Standards for Reporting of Diagnostic Accuracy studies (STARD) and Quality of Diagnostic Accuracy Studies-2 (QUADAS-2). Overall, there was a moderate to low risk of bias and low concern regarding applicability of the 29 studies reviewed.

QUADAS- 2

| Study                           | Risk of Bias               |                   |            |                    |                 | Applicability Concerns |            |                    | STARD Score |
|---------------------------------|----------------------------|-------------------|------------|--------------------|-----------------|------------------------|------------|--------------------|-------------|
|                                 | Overall Diagnostic Quality | Patient Selection | Index Test | Reference Standard | Flow and Timing | Patient Selection      | Index Test | Reference Standard |             |
| <i>Vishinkin 2021</i>           | Good                       | Low               | Low        | Low                | Low             | Low                    | Low        | Low                | 21          |
| <i>Wooding 2020</i>             | Good                       | Low               | Low        | Low                | Low             | Low                    | Low        | Low                | 15          |
| <i>Ashrafi 2020</i>             | Good                       | Low               | Low        | Low                | Low             | Low                    | Low        | Low                | 20          |
| <i>Monedeiro 2020</i>           | Good                       | Low               | Low        | Low                | Low             | Low                    | Low        | Low                | 26          |
| <i>Roodt 2018</i>               | Fair                       | Low               | Low        | Low                | Low             | Low                    | Low        | Low                | 19          |
| <i>Mochalski 2018</i>           | Good                       | Low               | Low        | Low                | Low             | Low                    | Low        | Low                | 25          |
| <i>Dolezal 2017</i>             | Fair                       | Low               | Low        | High               | High            | Low                    | Low        | Low                | 23          |
| <i>Duffy 2017</i>               | Good                       | Low               | Low        | Low                | Low             | Low                    | Low        | Low                | 23          |
| <i>Grabowska-Polanoska 2017</i> | Good                       | Low               | Low        | Low                | Unclear         | Low                    | Low        | Unclear            | 18          |
| <i>Martin 2016</i>              | Good                       | Low               | Low        | Low                | Low             | Low                    | Low        | Low                | 19          |
| <i>Velhurst 2016</i>            | Good                       | Low               | Low        | Low                | Low             | Low                    | Low        | Low                | 23          |
| <i>Mochalski 2014</i>           | Good                       | Low               | Low        | Low                | Low             | Low                    | Low        | Low                | 17          |
| <i>Mochalski 2014</i>           | Good                       | Low               | Low        | Low                | Low             | Low                    | Low        | Low                | 21          |
| <i>Broza 2014</i>               | Good                       | Low               | Low        | Low                | Low             | Low                    | Low        | Low                | 18          |
| <i>Abaffy 2013</i>              | Good                       | Low               | Low        | Low                | Low             | Low                    | Low        | Low                | 20          |
| <i>Kusano 2013</i>              | Good                       | Low               | Low        | Low                | Low             | Low                    | Low        | Low                | 19          |
| <i>Dormont 2013</i>             | Good                       | Low               | Low        | Low                | Low             | Low                    | Low        | Low                | 24          |
| <i>Ruzsanyi 2012</i>            | Good                       | Low               | Low        | Low                | Low             | Low                    | Low        | Low                | 27          |
| <i>Prada 2011</i>               | Fair                       | Low               | High       | High               | High            | Low                    | Low        | Low                | 24          |
| <i>Abaffy 2010</i>              | Good                       | Low               | Low        | Low                | Low             | Low                    | Low        | Unclear            | 12          |
| <i>Thomas 2010</i>              | Good                       | Low               | Low        | Low                | Low             | Low                    | Low        | Low                | 18          |
| <i>Turner 2008</i>              | Fair                       | Unclear           | Low        | Low                | High            | Low                    | Low        | Low                | 18          |
| <i>Gallagher 2008</i>           | Good                       | Unclear           | Low        | Low                | High            | Low                    | Low        | Low                | 21          |
| <i>Curran 2007</i>              | Fair                       | Unclear           | Low        | Low                | Low             | Unclear                | Low        | Low                | 18          |
| <i>Zhang 2005</i>               | Fair                       | Unclear           | High       | High               | High            | Low                    | Low        | Low                | 17          |
| <i>Curran 2005</i>              | Fair                       | Unclear           | Low        | Low                | Low             | Unclear                | Low        | Low                | 21          |
| <i>Haze 2001</i>                | Good                       | Unclear           | High       | Low                | High            | Unclear                | Low        | Low                | 21          |
| <i>Meijerink 2000</i>           | Good                       | Unclear           | Low        | Low                | Low             | Unclear                | Low        | Low                | 16          |
| <i>Bernier 2000</i>             | Fair                       | Unclear           | High       | High               | High            | Unclear                | Low        | Low                | 17          |

**Table S2b: Risk of bias and applicability concerns using QUADAS- 2**

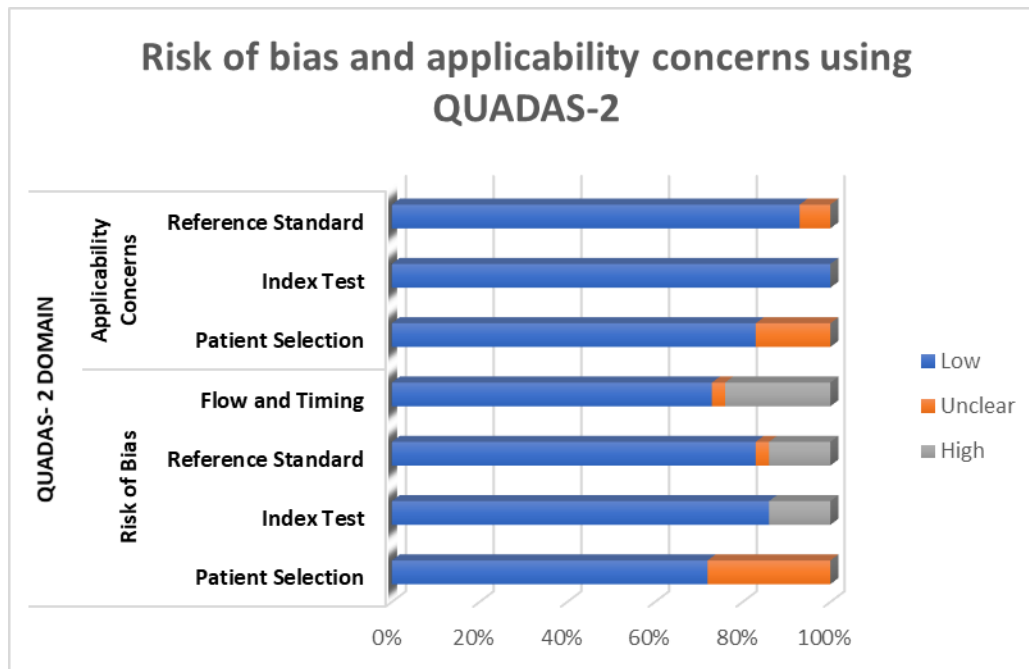

### Supplementary File S3: Details of Volatile Organic Compounds Emitted from Disease Free Human Skin

| Author    | Year | Healthy/ Disease        | Number of Identified Compounds       | Compounds                                                                                                                                                                                                                                                                                                                                                                                                                                                                                                                                                                                                                                                                                                                                                                                                                                                                                                                                                                                                                             |
|-----------|------|-------------------------|--------------------------------------|---------------------------------------------------------------------------------------------------------------------------------------------------------------------------------------------------------------------------------------------------------------------------------------------------------------------------------------------------------------------------------------------------------------------------------------------------------------------------------------------------------------------------------------------------------------------------------------------------------------------------------------------------------------------------------------------------------------------------------------------------------------------------------------------------------------------------------------------------------------------------------------------------------------------------------------------------------------------------------------------------------------------------------------|
| Vishinkin | 2021 | Infection               | 6                                    | Acetic acid, octanoic acid, 1-hexanol, 2-ethyl-, hexyl butyrate, toluene, cyclopropane, pentyl-                                                                                                                                                                                                                                                                                                                                                                                                                                                                                                                                                                                                                                                                                                                                                                                                                                                                                                                                       |
| Wooding   | 2020 | Healthy                 | 38                                   | Dodecanoic acid, Tetradecanoic acid/Myristic Acid, Pentadecanoic acid, Heptadecanoic acid 9,12-Octadecadienoic acid (Z,Z)-, Octanal, 2- Undecanone, 1-Octanol/Octanol/Isooctanol, 1-Nonanol, Octadecanol, 1-eicosanol, ethanol, 2-(2-ethoxyethoxy)-, ethanol, 2-(dodecyloxy)-, 1, octanol, 2-butyl, 1-heptanol, 6-methyl-, hexadecen-1-ol, trans-9-, Butyrolactone, 2,6,10,15,19,23-hexamethyl-2,6,10,14,18,22-tetracosahexaene (squalene), cyclooctatetraene, naphthalene,5-ethyl-1,2,3,4—tetrahydro, cyclobutylamine, benzonitrile, 3,5-dimethyl-, pentadecane,2-methyl- hexadecane, 3-methyl, Hexadecane, 2,6,10,14-tetramethyl-, Octane, 1,1'-oxybis-, 4-cyanocyclohexane, Methyl salicylate, acetic acid, octyl ester, octadecanoic acid, 2,3, dihydroxypropyl ester, benzene butanoic acid gamma-oxo-, ethyl ester, Isopropyl Palmitate 1,2-Benzenedicarboxylic acid, bis(2-methylpropyl) ester, octyl acrylate, benzaldehyde, 4-methyl- Benzenemethanol, $\alpha,\alpha$ -dimethyl-, phenanthrene, 2,6-Diisopropyl naphthalene |
| Ashrafi   | 2020 | Wound Infection         | 10                                   | Hexanal, 2-(2-Dodecoxyethoxy) ethanol, Octane, 1,1'-oxybis-, 1,2,3,6-Tetrahydropyridine, Glycerol/ Propane-1,2,3-triol, Linolenic acid, Adenosine, L- glutamine, 1,3-Dihydroxyacetone dimer                                                                                                                                                                                                                                                                                                                                                                                                                                                                                                                                                                                                                                                                                                                                                                                                                                           |
| Monedeiro | 2020 | Visceral Adenocarcinoma | 52 (total), 18/52 (cancer compounds) | <b>Healthy:</b> Octanal, 1-Octanol/Octanol/Isooctanol, 1-Hexanol, 2-ethyl-, 2-methyl dodecanoic acid, Heptanal, n-Pentanal, 2-Butenal, (E)-, Methacrolein, 4-methyl-2-heptanone, 2-phenoxyethanol, 7-Octen-2-ol, 2,6-dimethyl-/Dihydromyrcenol, Limonene, 1-undecene, Carbon disulfide, Tridecane Furan, 2-pentyl-, Phenol, Benzyl alcohol, Acetic acid/Ethanoic acid, Toluene, Hexanal, Nonanal, Decanal, 2,4-dodecadienal, 2-Butanone, 5-Hepten-2-one, 6-methyl-, 6-Methyl-3,5-heptadiene-2-one, Geranylacetone/6,10-Dimethylundeca-5,9-dien-2-one, 2,4-dimethyl-3-pentanone, 2-butyl-cyclohexanone, 2,3-butanediol, 3,7-dimethyl-3-octanol, 3-methyl-1-butanol, Styrene, 4-methyl-1-hexene, 3,3-dimethyl-octene, 2-methylpentadecene, 5-methylhexen-2-ene, Acetonitrile, 2-methyl-pentane, 2,6,7-trimethyl-decane, 3-methyl-pentane, 6-methyl-tridecane, 5,8-diethyl-dodecane n-Heptane, methyl cyclopentane, 2,4-dimethyl-pentane, 3-ethyl-pentane, Butanoic acid, Heptyl ester, Oxalic acid,                                     |

|           |      |         |    |                                                                                                                                                                                                                                                                                                                                                                                                                                                                                                                                                                                                                                                                                                                                                                                                                                                                                                                                                                                                                                                                                                                                                                                                                                                                                                                                                                                                                                                                                                                                                                                                                                                                                                                                                                                                                                                                                                                                                                                                             |
|-----------|------|---------|----|-------------------------------------------------------------------------------------------------------------------------------------------------------------------------------------------------------------------------------------------------------------------------------------------------------------------------------------------------------------------------------------------------------------------------------------------------------------------------------------------------------------------------------------------------------------------------------------------------------------------------------------------------------------------------------------------------------------------------------------------------------------------------------------------------------------------------------------------------------------------------------------------------------------------------------------------------------------------------------------------------------------------------------------------------------------------------------------------------------------------------------------------------------------------------------------------------------------------------------------------------------------------------------------------------------------------------------------------------------------------------------------------------------------------------------------------------------------------------------------------------------------------------------------------------------------------------------------------------------------------------------------------------------------------------------------------------------------------------------------------------------------------------------------------------------------------------------------------------------------------------------------------------------------------------------------------------------------------------------------------------------------|
|           |      |         |    | allyl nonyl ester, 1,4-dimethylbenzene/xylene, Methyl benzoate, Ethylbenzene<br><br><b>Cancer:</b> Octanal, 1-Octanol/Octanol/Isooctanol, 1-Hexanol, 2-ethyl-, 2-methyl dodecanoic acid<br>Heptanal, n-Pentanal, 2-Butenal, (E)-, Methacrolein, 4-methyl-2-heptanone, 2-phenoxyethanol<br>7-Octen-2-ol, 2,6-dimethyl-/Dihydromyrcenol, Limonene, 1-undecene, Carbon disulfide, Tridecane, Furan, 2-pentyl-, Phenol, Benzyl alcohol                                                                                                                                                                                                                                                                                                                                                                                                                                                                                                                                                                                                                                                                                                                                                                                                                                                                                                                                                                                                                                                                                                                                                                                                                                                                                                                                                                                                                                                                                                                                                                          |
| Roodt     | 2018 | Healthy | 86 | Octanal, 1-Octanol/Octanol/Isooctanol, 1-Hexanol, 2-ethyl-, Heptanal, 2-Butenal, (E)-, 7-Octen-2-ol, 2,6-dimethyl-/Dihydromyrcenol, Limonene, Phenol, Benzyl alcohol, Acetic acid/Ethanoic acid, Hexanal, Nonanal, Decanal, 5-Hepten-2-one, 6-methyl-, 6-Methyl-3,5-heptadiene-2-one, Geranylacetone/6,10-Dimethylundeca-5,9-dien-2-one, Dodecanoic acid, Tetradecanoic acid/Myristic Acid, Pentadecanoic acid, Heptadecanoic acid, 9,12-Octadecadienoic acid (Z,Z)-, 2-Undecanone, 1-Nonanol, Butyrolactone, Benzenemethanol, $\alpha,\alpha$ -dimethyl-, Octanoic acid, Propanoic acid, Butanoic acid, Hexanoic acid, Heptanoic acid, Nonanoic acid, Decanoic acid, Tridecanoic acid, Hexadecanoic acid/n-hexadecanoic acid, Octadecanoic acid, Butanoic acid, 3-methyl-/Isovaleric acid, Hexanoic acid, 2-ethyl-, 2-Octenal, (E)-, 2-Nonenal, (E)-, 2-Decenal, (E)-2-Undecenal, Furfural/2-Furancarboxyaldehyde, 2-Furancarboxaldehyde, 5-methyl-, 2-Heptanone<br>2-Octanone, 2-Nonanone, 2-Decanone, 2-Dodecanone, 2-Tridecanone, 2-Pentadecanone, 2-Hexadecanone, Acetophenone/1-phenyl-ethanone, 1-Hydroxy-2-butanone, Furyl hydroxymethyl ketone, 4H-Pyran-4-one, 2,3-dihydro-3,5-dihydroxy-6-methyl-, Ethanone, 1-(2-furanyl)-, Ethanone, 1-(4-methylphenyl)-, 2-Undecanone, 6,10-dimethyl-, 2,3-Pentanedione, Cyclopentanone, 2-Cyclopenten-1-one, Cyclopent-4-ene-1,3-dione, 2-Cyclopenten-1-one, 2-methyl-, 2-Cyclopenten-1-one, 3-methyl-, 1-Butanol, 2(3H)-Furanone, 5-methyl-, 2(5H)-Furanone<br>2(3H)-Furanone, 5-butyldihydro-, 2(3H)-Furanone, 5-hexyldihydro-, 2(3H)-Furanone, 5-heptyldihydro-, Linalool/3, 7- dimethyl-1,6-octadien-3-ol, $\alpha$ -Pinene, Benzonitrile, Pyrrole, Pyridine<br>Indole, 3-methyl-, 5,10-Diethoxy-2,3,7,8-tetrahydro-1H,6H-dipyrrolo[1,2- $\alpha$ :1',2'- $\delta$ ]pyrazine, Dimethyl sulfone, Dimethyl trisulphide, 1H-indole, Benzoic acid/Benzaldehyde, Benzeneacetaldehyde, Phenol, 2-methyl-, p-Cresol/4-methylphenol, Benzophenone, Benzothiazole |
| Mochalski | 2018 | Healthy | 17 | Heptanal, Acetic acid/Ethanoic acid, Hexanal, Benzoic acid/Benzaldehyde, 2-Propenal/Acrolein<br>Butanal, 3-methyl-, Propanal, 2-methyl-, 2-Ethacrolein, 2-Propanone/Acetone, 2-Pentanone<br>4-Methyl-2-pentanone, 2-Methyl-1-propanol, n-Butyl acetate, Ethyl formate, Ethyl propionate                                                                                                                                                                                                                                                                                                                                                                                                                                                                                                                                                                                                                                                                                                                                                                                                                                                                                                                                                                                                                                                                                                                                                                                                                                                                                                                                                                                                                                                                                                                                                                                                                                                                                                                     |

|         |      |                      |     |                                                                                                                                                                                                                                                                                                                                                                                                                                                                                                                                                                                                                                                                                                                                                                                                                                                                                                                                                                                                                                                                                                                                                                                                                                                                                                                                                                                                                                                                                                                                                                                                                                                                                                                                                                                                                                                                                                                                                                                                                                                                                                                                                                                                                                                                                                                                                                                                                                                                                                                                                                                                                                                                                                                                                                                                                                                                                                                                                                   |
|---------|------|----------------------|-----|-------------------------------------------------------------------------------------------------------------------------------------------------------------------------------------------------------------------------------------------------------------------------------------------------------------------------------------------------------------------------------------------------------------------------------------------------------------------------------------------------------------------------------------------------------------------------------------------------------------------------------------------------------------------------------------------------------------------------------------------------------------------------------------------------------------------------------------------------------------------------------------------------------------------------------------------------------------------------------------------------------------------------------------------------------------------------------------------------------------------------------------------------------------------------------------------------------------------------------------------------------------------------------------------------------------------------------------------------------------------------------------------------------------------------------------------------------------------------------------------------------------------------------------------------------------------------------------------------------------------------------------------------------------------------------------------------------------------------------------------------------------------------------------------------------------------------------------------------------------------------------------------------------------------------------------------------------------------------------------------------------------------------------------------------------------------------------------------------------------------------------------------------------------------------------------------------------------------------------------------------------------------------------------------------------------------------------------------------------------------------------------------------------------------------------------------------------------------------------------------------------------------------------------------------------------------------------------------------------------------------------------------------------------------------------------------------------------------------------------------------------------------------------------------------------------------------------------------------------------------------------------------------------------------------------------------------------------------|
|         |      |                      |     | Vinyl butyrate, Ethyl isovalerate                                                                                                                                                                                                                                                                                                                                                                                                                                                                                                                                                                                                                                                                                                                                                                                                                                                                                                                                                                                                                                                                                                                                                                                                                                                                                                                                                                                                                                                                                                                                                                                                                                                                                                                                                                                                                                                                                                                                                                                                                                                                                                                                                                                                                                                                                                                                                                                                                                                                                                                                                                                                                                                                                                                                                                                                                                                                                                                                 |
| Dolezal | 2017 | Healthy (all female) | 137 | <p>Heptanal, Octanal, Limonene, Nonanal, Decanal, Tetradecanoic acid/Myristic Acid, Pentadecanoic acid, Heptadecanoic acid, Benzenemethanol, <math>\alpha,\alpha</math>-dimethyl-, Hexadecanoic acid/n-hexadecanoic acid, Octadecanoic acid, 2-Decanone, Acetophenone/1-phenyl-ethanone, <math>\alpha</math>-Pinene, Tridecane, styrene, ethylbenzene, 2,6,10,15,19,23-hexamethyl-2,6,10,14,18,22-tetracosahexaene (squalene), 9-Octadecenoic acid, 13-Docosenoic acid, Dodecanal,, Tetradecanal, Undecanal, Octadecanal, Hexadecanal, Heptadecanal, Tridecanal, 4,8,12-Tetradecatrienal, 5,9,13-trimethyl-, 2,6-Di-tert-butyl-o-benzoquinone, 1-Hexadecanol, Octadecan-2-ol, 1-tetradecanol, Pentadecan-1-ol, n-Octacosan-1-ol, 1-Dodecanol, 1-Dodecanol, 2-methyl-2-Methyl-1-undecanol, 2-Butoxyethanol, 1-Decanol, 2-ethyl-, 2-(2-Dodecoxyethoxy)ethanol <math>\beta</math>-Pinene/6,6-dimethyl-2-methylene-, (IS)-Bicyclo[3.1.1]heptane, 1- dodecane, a- Springene, Docosenamide, Dodecane, Decane, Ethyl cyclohexane, 4-methyl octane, 3- methyl octane , Caffeine, Tocopherol, Octadecanoic acid, phenyl ester, Tetradecanoic acid, undecyl ester hexanedioic acid, octyl ester, Butan-2-yl 4-ethylbenzoate, Butyl pentanoate, 2,3-Diacetyloxypropyl acetate (Triacetin), Butyl octanoate, Isopropyl dodecanoate, 2-Ethylhexyl benzoate/Benzoic acid, 2-ethylhexyl ester, Propan-2-yl tetradecanoate, 1,4-dioxacycloheptadecane-5,17-dione, 1,2,3-Propanetriol 2-octadecanoyl ester, 2,3-Dihydroxypropyl hexadecanoate, 2,3-Dihydroxypropyl 10-hydroxyoctadecanoate, 2,3-dihydroxypropyl 12-hydroxyoctadecanoate, Tetradecyl dodecanoate Hexadecyl octanoate, 2,3-dihydroxypropyl octadec-9-enoate, Octadecyl 2-ethylhexanoate, Dodecyl tetradec-9-enoate, Tetradecyl tetradecanoate, Decyl octadecenoate, Dodecyl hexadec-9-enoate, Octadecyl tetradec-9-enoate, Hexyl octadec-9-enoate, Hexadecyl tetradecanoate Tetradecyl hexadec-9-enoate, Octadecyl hexadec-9-enoate, Lauryl palmitoleate, Heptadecyl heptadecanoate, Icosyl octadecenoate, Dodecyl x-ester, 2-ethylhexyl 2-ethylhexanoate, Butyl hexanoate, Hexadecanoic acid, 1-methylethyl ester, Ethyl hexadecanoate/Palmitic acid, ethyl ester, Propan-2-yl hexadecanoate, Methyl octadecenoate, Butyl nonanoate, 1,2,3- triethyl 2-hydroxypropane- 1,2,3 tricarboxylate, cholesta-3,5-diene, Cholest-5-en-3-ol (<math>3\beta</math>)-, propanoate Cholest-5-en-3-ol (<math>3\beta</math>)-, nonanoate, Cholest-5-en-3-ol (<math>3\beta</math>)-, tetradecanoate, Cholesta-4,6-dien-3-ol, (<math>3\beta</math>)-, Cholesterol, Cholest-7-en-3-ol, (<math>3\beta,5\alpha</math>)- (Lathosterol), Lanost-8-en-3-ol, Benzene, 1,1'-(2-butene-1,4-diyl)bis-, Benzene, 1,1'-(3-methyl-1-propene-1,3-diyl)bis-, Benzene, 1-ethyl-2-methyl-, Benzene, (1-methylethyl)-, <math>\alpha</math>-hexyl cinnamaldehyde, Phenol, 3,5-bis(1,1-dimethylethyl)-Naphthalene, Naphthalene, 1-methyl-, Epimanool</p> |

|                     |      |                                 |    |                                                                                                                                                                                                                                                                                                                                                                                                                                                                                                                                                                                                                                                                                                                                                                                                                                                                             |
|---------------------|------|---------------------------------|----|-----------------------------------------------------------------------------------------------------------------------------------------------------------------------------------------------------------------------------------------------------------------------------------------------------------------------------------------------------------------------------------------------------------------------------------------------------------------------------------------------------------------------------------------------------------------------------------------------------------------------------------------------------------------------------------------------------------------------------------------------------------------------------------------------------------------------------------------------------------------------------|
| Duffy               | 2017 | Healthy                         | 35 | <p>Heptanal, Octanal, Nonanal, Decanal, Tetradecanoic acid/Myristic Acid, Pentadecanoic acid</p> <p>Hexadecanoic acid/n-hexadecanoic acid, 2,6,10,15,19,23-hexamethyl-2,6,10,14,18,22-tetracosahexaene (squalene), Dodecanal, Tetradecanal, Undecanal, Tridecanal, 1-Hexadecanol</p> <p>Acetic acid/Ethanoic acid, Hexanal, 1-Octanol/Octanol/Isooctanol, 1-Hexanol, 2-ethyl-, 5-Hepten-2-one, 6-methyl-, Dodecanoic acid, Nonanoic acid, Decanoic acid, 2-Decenal, (E)-, 2-Undecanone, 6,10-dimethyl-, Octane, 1,1'-oxybis-, Isopropyl Palmitate, Undecanoic acid, Glycine</p> <p>Lilial/<math>\alpha</math>-methyl-<math>\beta</math>-(p-tert-butylphenyl)propanal, Tridecanol/1-tridecanol, Pentadecene, 1-Tridecene</p> <p>Tetradecane, Pentadecane, Propanoic acid, 2-methyl-, 1-(1,1-dimethylethyl)-2-methyl-1,3-propanediyl ester, N,N-dimethyl-1-hexadecanamine</p> |
| Grabowska-Polanoska | 2017 | Healthy (mechanical disruption) | 49 | <p>Heptanal, Octanal, Nonanal, Decanal, Acetic acid/Ethanoic acid, Hexanal, Limonene, Acetophenone/1-phenyl-ethanone, <math>\alpha</math>-Pinene, Styrene, Ethylbenzene, Ethyl cyclohexane, Benzoic acid/Benzaldehyde, 2-Propenal/Acrolein, Propanal, 2-methyl-, 2-Propanone/Acetone, n-Butyl acetate, Phenol, Butyrolactone, 1-Butanol, n-Pentanal, Carbon disulfide, Toluene, 2-Butanone, Acetonitrile, n-Heptane, Methyl cyclopentane, 2,4-dimethyl-pentane, 1,4-dimethylbenzene/xylene</p> <p>n-Butanal, Acetaldehyde, 2-Propenal, 2-methyl-, Butanal, 2-methyl-, Ethanol/ethyl alcohol, 2-Propanol, 1,3-Pentadiene, 2-methyl-, (Z)-, 2-Butene, (E)-, Dimethyl sulfide, Nonane, Hexane, Cyclohexane, Methyl cyclohexane, 2,4-dimethylhexane, 2,3 dimethylheptane, Ethyl cyclopentane, Butane, Methyl acetate, Ethyl Acetate, Benzene</p>                                |
| Martin              | 2016 | Healthy (psychological stress)  | 4  | <p>Benzoic acid, n-decanoic acid, xylene (downregulated), 3-carene (downregulated)</p>                                                                                                                                                                                                                                                                                                                                                                                                                                                                                                                                                                                                                                                                                                                                                                                      |
| Velhurst            | 2016 | Healthy                         | 23 | <p>Decanoic acid, Tetradecanoic acid/Myristic Acid, Pentadecanoic acid, Hexadecanoic acid/n-hexadecanoic acid, Dodecanoic acid, Nonanoic acid, 1-Dodecanol, 2-methyl-, Geranylacetone/6,10-Dimethylundeca-5,9-dien-2-one, Octanoic acid, Hexanoic acid, Heptanoic acid, Tridecanoic acid, Butanoic acid, 3-methyl-/Isovaleric acid, Hexanoic acid, 2-ethyl-, 3-methyl-1-butanol, 9-hexadecanoic acid, Cedrol, Lactic acid, Isopropyl Myristate, Ethyl tetradecanoate, Ethyl citrate, Tributyl acetylcitrate, 1,1-dimethyl-3-phenyl propanol</p>                                                                                                                                                                                                                                                                                                                             |
| Mochalski           | 2014 | Healthy                         | 64 | <p>Benzoic acid/Benzaldehyde, Heptanal, Octanal, Nonanal, Hexanal, 5-Hepten-2-one, 6-methyl-, Limonene, 2-Propenal/Acrolein, Propanal, 2-methyl-, 2-Propanone/Acetone, n-Butyl acetate, Butyrolactone, n-Pentanal, 2-Butanone, Acetonitrile, n-Heptane, n-Butanal, Acetaldehyde, 2-Propenal, 2-methyl-, Butanal, 2-methyl-, Ethanol/ethyl alcohol, 2-Propanol, 1,3-</p>                                                                                                                                                                                                                                                                                                                                                                                                                                                                                                     |



|           |      |         |     |                                                                                                                                                                                                                                                                                                                                                                                                                                                                                                                                                                                                                                                                                                                                                                                                                                                                                                                                                                                                                                                                                                                                                                                                                                                                                                                                                                                                                                                                                                                                                                                                                                                                                                                                                                                                                                                              |
|-----------|------|---------|-----|--------------------------------------------------------------------------------------------------------------------------------------------------------------------------------------------------------------------------------------------------------------------------------------------------------------------------------------------------------------------------------------------------------------------------------------------------------------------------------------------------------------------------------------------------------------------------------------------------------------------------------------------------------------------------------------------------------------------------------------------------------------------------------------------------------------------------------------------------------------------------------------------------------------------------------------------------------------------------------------------------------------------------------------------------------------------------------------------------------------------------------------------------------------------------------------------------------------------------------------------------------------------------------------------------------------------------------------------------------------------------------------------------------------------------------------------------------------------------------------------------------------------------------------------------------------------------------------------------------------------------------------------------------------------------------------------------------------------------------------------------------------------------------------------------------------------------------------------------------------|
|           |      |         |     | <p>Pentadiene, 2-methyl-, (Z)-, 2-Butene, (E)-, Dimethyl sulfide, Nonane, Ethyl Acetate, <math>\beta</math>-Pinene/6,6-dimethyl-2-methylene-, (IS)-Bicyclo[3.1.1]heptane, Butanal, 3-methyl-, 2-Pentanone, 2-Butenal, (E)-, 2-Heptanone, Furan, 2-pentyl-, n- Propanal, 2-Hexenal, (E)-, 2-Butenal, 3-methyl-, Butanal, 2-ethyl-</p> <p>2-Hexanone, 3-Buten-2-one/Methyl vinyl ketone, 3-Penten-2-one, 4-methyl-, p- cymene, Styrene, p,<math>\alpha</math>-dimethyl-, Eucalyptol, 1-Octene, 1-Heptene, 2-Heptene, Isoprene, 1-Nonene, 2-Pentene, 2-methyl-, 1,3-Pentadiene, 2-methyl-, (E)-, Propene, 1-Pentene, 2-Butene, (Z)-, 2-Butene, 2,3-dimethyl-, Sulfide, allyl methyl, n-Octane, n-Pentane, Furan, 3-methyl-, Furan, 2-methyl-, 1,3-Dioxolane, 2-methyl-, Furan, 2,5-dimethyl-, 1,3-Dioxolane, Isopropyl acetate, Isobutyl acetate</p>                                                                                                                                                                                                                                                                                                                                                                                                                                                                                                                                                                                                                                                                                                                                                                                                                                                                                                                                                                                                            |
| Mochalski | 2014 | Healthy | 12  | <p>Heptanal, Octanal, Nonanal, Hexanal, 5-Hepten-2-one, 6-methyl-, Limonene, 2- Propanone/Acetone, 2-Butanone, 2-Propenal, 2-methyl-, n- Propanal, 3-Buten-2-one/Methyl vinyl ketone, 2-Pentene, 2-methyl-</p>                                                                                                                                                                                                                                                                                                                                                                                                                                                                                                                                                                                                                                                                                                                                                                                                                                                                                                                                                                                                                                                                                                                                                                                                                                                                                                                                                                                                                                                                                                                                                                                                                                               |
| Broza     | 2014 | Healthy | 271 | <p>Heptanal, Octanal, Nonanal, Hexanal, 5-Hepten-2-one, 6-methyl-, Limonene, 2- Propanone/Acetone, 2-Butanone, Benzoic acid/Benzaldehyde, Propanal, 2-methyl-</p> <p>n-Butyl acetate, n-Heptane, Butanal, 2-methyl- nonane, Ethyl Acetate, <math>\beta</math>-Pinene/6,6-dimethyl-2-methylene-, (IS)-Bicyclo heptane, Butanal, 3-methyl-, Eucalyptol, 1-Octene, Isoprene, 1-Nonene</p> <p>n-Pentane, Geranylacetone/6,10-Dimethylundeca-5,9-dien-2-one, Isopropyl Myristate, Decanal</p> <p>Acetic acid/Ethanoic acid, Dodecanal, Undecanal, Tridecanal, 1-Hexanol, 2-ethyl-, 2-Decenal, (E)-, Isopropyl Palmitate, Lilial/<math>\alpha</math>-methyl-<math>\beta</math>-(p-tert-butylphenyl)propanal, Tetradecane, Pentadecane, Acetophenone/1-phenyl-ethanone, <math>\alpha</math>-Pinene, Ethylbenzene, Carbon disulfide, Toluene, Methyl cyclopentane, 2,4-dimethyl-pentane, Hexane, Methyl cyclohexane, Benzene</p> <p>1-Dodecanol, Dodecane, Decane, 4-Methyl-2-pentanone, 7-Octen-2-ol, 2,6-dimethyl-/Dihydromyrcenol, 1H-indole, 3,7-dimethyl-3-octanol, 3-methyl-pentane, Propanedioic acid</p> <p>2-n-butylacrolein, 1,7,7-trimethylbicyclo(2;2;1)heptan-2-one, Tonalid, <math>\alpha</math>-Isomethylionone, 2-methyl-5-(1-methylethenyl)-, (R)- 2-Cyclohexen-1-one, 1-(1-methylethoxy)-2-propanol</p> <p>propylene glycol/1,2-propanediol, 2,2'oxybis-ethanol, 2-(2-hydroxypropoxy)-1-propanol</p> <p>2,2-dimethyl-, diacetate 1,3-Propanediol, 2-(2-Hexyloxyethoxy)ethanol, (E)-3-Nonen-1-ol, 3,7-dimethyl-6-octen-1-ol, 3,7-dimethyl-1,6,octadien-3-ol, 3,7-dimethyl-,acetate 6-octen-1-ol, 3,7-dimethyl-,acetate 1,6-octadien-3-ol, 3,7-dimethyl-,acetate, (Z)-2,6-Octadien-1-ol, 5-methyl-2-(1-methylethenyl)-, acetate 4 hexen-1-ol, cyclohexanol,2-(1,1-dimethylethyl)-, 4-methyl-1-(1-methylethyl)- 3-Cyclohexen-1-ol, 1-methyl-4-(1-</p> |

|  |  |  |                                                                                                                                                                                                                                                                                                                                                                                                                                                                                                                                                                                                                                                                                                                                                                                                                                                                                                                                                                                                                                                                                                                                                                                                                                                                                                                                                                                                                                                                                                                                                                                                                                                                                                                                                                                                                                                                                                                                                                                                                                                                                                                                                                                                                                                                                                                                                                                                                                                                                                                                                                                                                                                                                                                                                                                                                                                                                                                                                     |
|--|--|--|-----------------------------------------------------------------------------------------------------------------------------------------------------------------------------------------------------------------------------------------------------------------------------------------------------------------------------------------------------------------------------------------------------------------------------------------------------------------------------------------------------------------------------------------------------------------------------------------------------------------------------------------------------------------------------------------------------------------------------------------------------------------------------------------------------------------------------------------------------------------------------------------------------------------------------------------------------------------------------------------------------------------------------------------------------------------------------------------------------------------------------------------------------------------------------------------------------------------------------------------------------------------------------------------------------------------------------------------------------------------------------------------------------------------------------------------------------------------------------------------------------------------------------------------------------------------------------------------------------------------------------------------------------------------------------------------------------------------------------------------------------------------------------------------------------------------------------------------------------------------------------------------------------------------------------------------------------------------------------------------------------------------------------------------------------------------------------------------------------------------------------------------------------------------------------------------------------------------------------------------------------------------------------------------------------------------------------------------------------------------------------------------------------------------------------------------------------------------------------------------------------------------------------------------------------------------------------------------------------------------------------------------------------------------------------------------------------------------------------------------------------------------------------------------------------------------------------------------------------------------------------------------------------------------------------------------------------|
|  |  |  | <p>methylethenyl)-, acetate cyclohexanol, Oxacycloheptadec-8-en-2-one , p-menth-1-en-8-ol (alpha-terpineol), patchouli ethanol, veridiflorol, 1,3-pentadiene, 2,7-dimethyl-1,7-octadiene, 3,7-dimethyl-, (S)-1,6-Octadiene, 5-octadecene, 4-cyanocyclohexene, monoamide, N-(2-ethylhexyl)-pentyl ester oxalic acid, sulfur dioxide, sulfurous acid, hexyl octyl ester, 2-ethylhexyl hexyl ester Sulfurous acid, Octadecane Butane, 2,2-dimethyl, Nonadecane, Dodecane, 2,6,10-trimethyl-, 2-methyl butane, 3,4-dimethylheptane, 2-methylheptane, 3-methyl heptane, 2,2,4,6,6-pentamethyl-Heptane , 5-methyl- Tetradecane, 4-methyl-pentadecane, 2-bromotetradecane, 1-methanol, 3,3-dimethyl-2-(3-methyl-1,3-butadienyl)-Cyclohexane, 2-methyl-octadecane, 2-bromododecane, 2,2,4,4,6,8,8-heptamethylnonane, 1,2-dimethyl-cis-cyclopropane, 1,2-dimethyl-trans-cyclopropane, Butane, 1,1,2,3,4,4-hexachloro-tetrafluoro-, 2,3-dimethyl butane, (2-Methylpropyl)-cyclohexane, 2,3-Dihydro-2,5-dimethyl-5H-1,4-dioxepin, 1-2-chloro-Benzamide, N-tetrahydrofurfuryl-ethenyl-3-methylene-cyclopentene, 1-(hexyloxy)-5-methyl-hexane, Bicyclo[3.1.0]hexan-2-ol, 2-methyl-5-(1-methylethyl)-, (1.alpha.,2.alpha.,5.alpha.)-, 3,7-dimethyl-1,3,6-Octatriene, 1-methyl-4-(1-methylethyl)- 1,4-Cyclohexadiene, 1-methyl-2-octyl-cyclopropane, Aristolene, 1,2,3,4,5,6,7,8-octahydro-1,4,9,9-tetramethyl-, [1S-(1.alpha.,4.alpha.,7.alpha.)]- 4,7-Methanoazulene, 5,5-Dimethyl-3-vinyl cyclohex-2-en-1-one, 4,4-Dimethyl-2-pentyl methylphosphonofluoridate Alpha, alpha.4-trimethyl- 3-Cyclohexene-1-methanol, 4-(2,6,6-trimethyl-2-cyclohexen-1-yl)-, (E)- 3-Buten-2-one, 4,7-Methano-1H-inden-6-ol, 3a,4,5,6,7,7a-hexahydro-, acetate, 1H-3a,7-Methanoazulene, octahydro-3,8,8-trimethyl-6-methylene-, [3R (3.alpha.,3a.beta.,7.beta.,8a.alpha.)]- , 1-(4-tert-Butylphenyl)propan-2-one, 3-(4-Isopropylphenyl)-2-methylpropionaldehyde, Cyclohexane, 1-ethenyl-1-methyl-2-(1-methylethenyl)-4-(1-methylethylidene)-, 4-(2,6,6-trimethyl-1-cyclohexen-1-yl)-, (E)- 3-Buten-2-one , 1,2-dimethyl-3,5-bis(1-methylethenyl)-Cyclohexane, Azulene, 1,2,3,4,5,6,7,8-octahydro-1,4-dimethyl-7-(1-methylethenyl)-, [1S-(1.alpha.,4.alpha.,7.alpha.)]- , 1,2,3,5,6,7-hexahydro-1,1,2,3,3-pentamethyl- 4H-Inden-4-one, 1-(2,6,6-trimethyl-2-cyclohexen-1-yl)- 1-Penten-3-one , 5-methyl-2-(1-methylethyl)-, cis- Cyclohexanone, Tricyclo[4.3.0.0(7,9)]nonane, 2,2,5,5,8,8-hexamethyl-, (1.alpha.,6.beta.,7.alpha.,9.alpha.)-, (1S)- Bicyclo[3.1.1]hept-2-ene, 6,6-dimethyl-2-[2-(phenylmethoxy)ethyl]-, 7-Acetyl-6-ethyl-1,1,4,4-tetramethyltetralin, tetradecyl oxirane 1-(1,2,3,4,7,7a-hexahydro-1,4,4,5-tetramethyl-1,3a-ethano-3aH-inden-6-yl)- Ethanone, 2,5-dihydro-furan, 2-Propenoic acid, 3-phenyl-, 2-methyl-2-propenyl ester, 12,15-octadecadiynoic acid, methyl ester, acetic acid, hexyl ester, isoctyl mercaptoacetate, 1,3-dimethylbutyl acetate</p> |
|--|--|--|-----------------------------------------------------------------------------------------------------------------------------------------------------------------------------------------------------------------------------------------------------------------------------------------------------------------------------------------------------------------------------------------------------------------------------------------------------------------------------------------------------------------------------------------------------------------------------------------------------------------------------------------------------------------------------------------------------------------------------------------------------------------------------------------------------------------------------------------------------------------------------------------------------------------------------------------------------------------------------------------------------------------------------------------------------------------------------------------------------------------------------------------------------------------------------------------------------------------------------------------------------------------------------------------------------------------------------------------------------------------------------------------------------------------------------------------------------------------------------------------------------------------------------------------------------------------------------------------------------------------------------------------------------------------------------------------------------------------------------------------------------------------------------------------------------------------------------------------------------------------------------------------------------------------------------------------------------------------------------------------------------------------------------------------------------------------------------------------------------------------------------------------------------------------------------------------------------------------------------------------------------------------------------------------------------------------------------------------------------------------------------------------------------------------------------------------------------------------------------------------------------------------------------------------------------------------------------------------------------------------------------------------------------------------------------------------------------------------------------------------------------------------------------------------------------------------------------------------------------------------------------------------------------------------------------------------------------|

|         |      |                                 |    |                                                                                                                                                                                                                                                                                                                                                                                                                                                                                                                                                                                                                                                                                                                                                                                                                                                                                                                                                                                                                                                                                                                                                                                                                                                                                                                                                                                                                                                                                                                                    |
|---------|------|---------------------------------|----|------------------------------------------------------------------------------------------------------------------------------------------------------------------------------------------------------------------------------------------------------------------------------------------------------------------------------------------------------------------------------------------------------------------------------------------------------------------------------------------------------------------------------------------------------------------------------------------------------------------------------------------------------------------------------------------------------------------------------------------------------------------------------------------------------------------------------------------------------------------------------------------------------------------------------------------------------------------------------------------------------------------------------------------------------------------------------------------------------------------------------------------------------------------------------------------------------------------------------------------------------------------------------------------------------------------------------------------------------------------------------------------------------------------------------------------------------------------------------------------------------------------------------------|
|         |      |                                 |    | bornyl acetate, 2-Deoxysorbitol pentaacetate, 2-ethylhexyl octyl ester Oxalic acid, Butyric acid, 1-methyl-1-p-tolylethyl ester, 2-methyl-, 1-(1,1-dimethylethyl)-2-methyl-1,3-propanediyl ester, Propanoic acid, 6-ethyloct-3-yl isohexyl ester Oxalic acid, 2-hydroxy-phenylmethyl ester benzoic acid, (2-phenyl-1,3-dioxolan-4-yl)methyl ester, trans- 9-Octadecenoic acid, 2-hydroxy-, pentyl ester Benzoic acid, 2-hydroxy-,3-methylbutyl benzoic acid, ethylene brassylate, 5-(1-Isopropenyl-4,5-dimethylbicyclo[4.3.0]nonan-5-yl)-3-methyl-2-pentenol acetate, 4-tert-butylcyclohexyl acetate, 3,N-dihydroxybutanamide, 1-Propanamine, N,2-dimethyl-N-nitroso-, nopyl acetate, 4-(2,5, dimethyl-1H-pyrrol-1-yl)-N,N-dimethyl-Benzenamine, trichloromethane, 2-chloropropane, Benzene, 1,3-dimethyl, Benzene, 1,2,3-trimethyl-, Benzene, (1-butylheptyl)-, Benzene, (1-pentylheptyl)-, Benzene, 1,4-bis(1,1-dimethylethyl)-, (1-methylnonyl)-benzene, 1,1'-(3,3-dimethyl-1-butenylidene)bis- Benzene, (1-propyloctyl)- Benzene, (1-ethyloctyl)- Benzene, benzenethanol,a,a-dimethyl-,1-acetate, Benzenemethanol, .alpha.-methyl-, acetate, 2H-1-Benzopyran, 3,5,6,8a-tetrahydro-2,5,5,8a-tetramethyl-, cis-, 1,3-didecyl- Benzene, o-xylene<br>1-methyl-2-(1-methylethyl)- Benzene, Butylated hydroxytoluene, alpha-cubebene, ambrox, 6,7-diethyl-1,2,3,4-tetrahydro-1,1,4,4-tetramethyl- Naphthalene, 1,3,4,6,7,8-hexahydro-4,6,6,7,8,8, Hexamethyl-cyclopenta-gamma-2-benzopyran/galaxolide, 1,3-diol monopropionate Indan |
| Kusano  | 2013 | Healthy                         | 35 | Heptanal, Octanal, Nonanal, Benzoic acid/Benzaldehyde, Geranylacetone/6,10-Dimethylundeca-5,9-dien-2-one, Decanal, Dodecanal, Undecanal, 1-Hexanol, 2-ethyl-, Tetradecane, Pentadecane, Acetophenone/1-phenyl-ethanone, Dodecane, Octadecane, Dodecanoic acid, Hexanoic acid, Tetradecanal, Pentadecene, Phenol, 2-Decanone, Tridecane, Benzyl alcohol, 2-Nonenal, (E)-, Furfural/2-Furancarboxyaldehyde, Linalool/3, 7-dimethyl-1,6-octadien-3-ol, Phenylpropanoic acid, Heptadecene, Undecane, Hexadecane, Eicosane, Tricosane, Docosane, Decanoic acid, methyl ester, Methyl 9-methyltetradecanoate, Octanoic acid, methyl ester                                                                                                                                                                                                                                                                                                                                                                                                                                                                                                                                                                                                                                                                                                                                                                                                                                                                                                |
| Abaffy  | 2013 | Melanoma                        | 6  | Dodecanoic acid, Toluene, Tetradecanoic acid/Myristic Acid, Hexadecanoic acid/n-hexadecanoic acid, 1-eicosane, 2- ethylhexyl- 4- methoxy- cinnamate                                                                                                                                                                                                                                                                                                                                                                                                                                                                                                                                                                                                                                                                                                                                                                                                                                                                                                                                                                                                                                                                                                                                                                                                                                                                                                                                                                                |
| Dormont | 2013 | Healthy (compared 4 techniques) | 44 | Nonanal, Decanal, 5-Hepten-2-one, 6-methyl-, Benzoic acid/Benzaldehyde, Octanal, Geranylacetone/6,10-Dimethylundeca-5,9-dien-2-one, Nonane, Tetradecane, Heptadecene<br>Pentadecane, Hexadecane, Dodecanal, 2,6,10,15,19,23-hexamethyl-2,6,10,14,18,22-tetracosahexaene (squalene), Decane, Nonanoic acid, Tetradecene, Hexanal, Dodecane, Undecane, 2-Nonenal, (E)-, Tridecane, $\alpha$ -Pinene, Undecanal, Limonene, Pentadecene, Linalool/3,                                                                                                                                                                                                                                                                                                                                                                                                                                                                                                                                                                                                                                                                                                                                                                                                                                                                                                                                                                                                                                                                                   |

|          |      |                 |    |                                                                                                                                                                                                                                                                                                                                                                                                                                                                                                                                                                                                                                                                                                                                                                                                                                                                                                                                                                                                                           |
|----------|------|-----------------|----|---------------------------------------------------------------------------------------------------------------------------------------------------------------------------------------------------------------------------------------------------------------------------------------------------------------------------------------------------------------------------------------------------------------------------------------------------------------------------------------------------------------------------------------------------------------------------------------------------------------------------------------------------------------------------------------------------------------------------------------------------------------------------------------------------------------------------------------------------------------------------------------------------------------------------------------------------------------------------------------------------------------------------|
|          |      |                 |    | <p>7- dimethyl-1,6-octadien-3-ol, Tridecanal, Ethyl Acetate, Methyl octadecenoate, Diethylsulfide, Methyl hexadecanoate, Octadecyl acetate</p> <p>Hexadecene, Decanoic acid, Octanoic acid, 1-Dodecanol, Lilial/<math>\alpha</math>-methyl-<math>\beta</math>-(p-tert-butylphenyl)propanal , 2-Decenal, (E)-, 2-Octenal, (E)-, Benzothiazole, (E)-2-Undecenal</p> <p>(E)-2-Heptenal, (E,E)-2,4-Nonadienal, Nonalactone</p>                                                                                                                                                                                                                                                                                                                                                                                                                                                                                                                                                                                                |
| Ruzsanyi | 2012 | Healthy         | 10 | <p>Nonanal, Decanal, 5-Hepten-2-one, 6-methyl-, Benzoic acid/Benzaldehyde, Octanal, Ethanol/ethyl alcohol, 1-Hexanol, 2-ethyl-, Ammonia, n-Butyl acetate, 2-Butenal, 3-methyl-</p>                                                                                                                                                                                                                                                                                                                                                                                                                                                                                                                                                                                                                                                                                                                                                                                                                                        |
| Prada    | 2011 | Healthy         | 51 | <p>Octanal, Nonanal, Benzoic acid/Benzaldehyde, Geranylacetone/6,10-Dimethylundeca-5,9-dien-2-one, Decanal, Dodecanal, Undecanal, Tetradecane, Pentadecane, Dodecane, Pentadecene, Tridecane, 2-Nonenal, (E)-, Linalool/3, 7- dimethyl-1,6-octadien-3-ol, Heptadecene, Undecane, Hexadecane, Hexanal, 5-Hepten-2-one, 6-methyl-, Limonene, Nonane, Ethyl Acetate, Tridecanal, <math>\alpha</math>-Pinene, Decane, Nonanoic acid, 2,6,10,15,19,23-hexamethyl-2,6,10,14,18,22-tetracosahexaene (squalene), Methyl octadecenoate, Tetradecene, Diethylsulfide, Methyl hexadecanoate, Octadecyl acetate, 2-Decenal, (E)-, Lilial/<math>\alpha</math>-methyl-<math>\beta</math>-(p-tert-butylphenyl)propanal , 1-Dodecanol, Decanoic acid, Octanoic acid, 2-Octenal, (E)-, Benzothiazole, (E)-2-Undecenal, (E)-2-Heptenal, (E,E)-2,4-Nonadienal, Nonalactone, Hexadecene</p>                                                                                                                                                   |
| Abaffy   | 2010 | Melanoma        | 9  | <p>Octanal, Nonanal, Decanal, Hexanal, Limonene, Heptanal, Ethylbenzene, 2-Ethylhexyl benzoate/Benzoic acid, 2-ethylhexyl ester, 1-Methyl-bis(1,2,4)-triazole-5,1'</p>                                                                                                                                                                                                                                                                                                                                                                                                                                                                                                                                                                                                                                                                                                                                                                                                                                                    |
| Thomas   | 2010 | Wound Infection | 46 | <p>Nonanal, Geranylacetone/6,10-Dimethylundeca-5,9-dien-2-one, 1-Hexanol, 2-ethyl-, Tetradecanal, Propylene glycol/1,2-propanediol, Butylated hydroxytoluene, Carene/3-carene</p> <p>Phenol, 3,5-bis(1,1-dimethylethyl)-, 1-eicosanol, 2-hexadecanol, 1-Dodecanol, 3,7,11-trimethyl- , 1,3-Pentenediol, 2,2,4-trimethyl- , 1-decanol,2-hexyl, 1-Propyl-3,6-diazahomoadamantan-9-ol, 2-Propanol, 1-(2-methoxy-1-methylethoxy)- , 3-decen-1-ol, E-2-Tetradecen-1-ol , Z,Z-2,5-Pentadecadien-1-ol, Cyclodecanol, 2-t-Butyl-5-propyl-[1,3]dioxolan-4-one, 1-nonadecene, 2-Methyl-Z-4-tetradecene, 7-tetradecene, Disulfide, dimethyl, Dodecane, 1,2-dibromo-, 3-Isopropyl-6a,10b-dimethyl-8-(2-oxo-2-phenyl-ethyl)-dodecahydro-benzo[f]chromen-7-one, 2-propanol, 1-(1-methylethoxy), 1,4-Methanoazulen-3-ol decahydro-1,5,5,8a-tetramethyl-, [1s-(1.a.,3.b.,3a.b.,4.a.,8a.b.)]-, a.-Ethylether of 11-epi-dihydroartemisinin, 4-Trifluoroacetoxypentadecane, 4-Trifluoroacetoxytetradecane, 2-Trifluoroacetoxypentadecane</p> |

|           |      |         |    |                                                                                                                                                                                                                                                                                                                                                                                                                                                                                                                                                                                                                                                                                                                                                                                                                                                                                                                                                                                                                                                                                                                                                                                                                                                                                                                                                                                                                                                                                                                                                                                                                                                                                                                                                                                                                                                                                                                                          |
|-----------|------|---------|----|------------------------------------------------------------------------------------------------------------------------------------------------------------------------------------------------------------------------------------------------------------------------------------------------------------------------------------------------------------------------------------------------------------------------------------------------------------------------------------------------------------------------------------------------------------------------------------------------------------------------------------------------------------------------------------------------------------------------------------------------------------------------------------------------------------------------------------------------------------------------------------------------------------------------------------------------------------------------------------------------------------------------------------------------------------------------------------------------------------------------------------------------------------------------------------------------------------------------------------------------------------------------------------------------------------------------------------------------------------------------------------------------------------------------------------------------------------------------------------------------------------------------------------------------------------------------------------------------------------------------------------------------------------------------------------------------------------------------------------------------------------------------------------------------------------------------------------------------------------------------------------------------------------------------------------------|
|           |      |         |    | <p>Propanoic acid, 2-methyl-, 3-hydroxy-2,4,4-trimethylpentyl ester, E-2-Methyl-3-tetradecen-1-ol acetate, Pentanoic acid, 2,2,4-trimethyl-3-carboxyisopropyl, isobutyl ester, 1,2-Benzenedicarboxylic acid, butyl 2-ethylhexyl ester, 2,6-Nonadienoic acid, 7-ethyl-9-(3-ethyl-3-methyloxiranyl)-3-methyl-, methyl ester, [2R-[2.a.(2E,6E),3.a.]-, Myristic acid, 9-hexadecenyl ester, (Z)-, Octadecanoic acid, 4-hydroxy-, methyl ester, Cyclopropaneoctanoic acid, 2-[(2-pentylcyclopropyl)methyl]-, methyl ester, trans,trans-, Z-3-Octadecen-1-ol acetate</p> <p>2-Indazol-2-ylphenylamine, Octadecane,1-chloro-, 1,3,5-Tris(trimethylsiloxy)benzene, 3-Benzoylmethyl-3-hydroxy-5-nitro-2-indolinone, 3-tert-butyl-5-chloro-2-hydroxybenzophenone</p>                                                                                                                                                                                                                                                                                                                                                                                                                                                                                                                                                                                                                                                                                                                                                                                                                                                                                                                                                                                                                                                                                                                                                                               |
| Turner    | 2008 | Healthy | 6  | <p>2- Propanone/Acetone, Acetaldehyde, Ethanol/ethyl alcohol, Methanol, Propanol, Ammonia</p>                                                                                                                                                                                                                                                                                                                                                                                                                                                                                                                                                                                                                                                                                                                                                                                                                                                                                                                                                                                                                                                                                                                                                                                                                                                                                                                                                                                                                                                                                                                                                                                                                                                                                                                                                                                                                                            |
| Gallagher | 2008 | Healthy | 90 | <p>2- Propanone/Acetone, Nonanal, Geranylacetone/6,10-Dimethylundeca-5,9-dien-2-one, Octanal</p> <p>Decanal, Benzoic acid/Benzaldehyde, Dodecanal, Linalool/3, 7- dimethyl-1,6-octadien-3-ol, 5-Hepten-2-one, 6-methyl-, Acetophenone/1-phenyl-ethanone, Hexanoic acid, Phenol, Acetic acid/Ethanoic acid, Lilial/<math>\alpha</math>-methyl-<math>\beta</math>-(p-tert-butylphenyl)propanal, 7-Octen-2-ol, 2,6-dimethyl-/Dihydromyrcenol, 1,7,7-trimethylbicyclo(2;2;1)heptan-2-one, 3,7-dimethyl-6-octen-1-ol, p-menth-1-en-8-ol (alpha-terpineol), 4-tert-butylcyclohexyl acetate, 1,3,4,6,7,8-hexahydro-4,6,6,7,8,8-hexamethyl-cyclopenta-gamma-2-benzopyran/galaxolide, p- cymene, Octanoic acid, Butanoic acid, 3-methyl-/Isovaleric acid, Hexanoic acid, 2-ethyl-, cedrol, 2-ethylhexyl 2-ethylhexanoate, Hexadecanoic acid, 1-methylethyl ester, <math>\alpha</math>-hexyl cinnamaldehyde, Propanoic acid, Butanoic acid</p> <p>Pyridine, Dimethyl sulfone, p-Cresol/4-methylphenol, 4-cyanocyclohexane, 2-(4-tert-butylphenyl) propanal, 5-(hydroxymethyl)-2-furaldehyde, 3,5,5-trimethylcyclohex-2-en-1-one (isophoron), 1-(2-methoxypropoxy)-2-propanol, 1,1'-oxybis-2-propanol, 1-octen-3-ol, 3,7-dimethyl-2,6-octadien-1-ol</p> <p>2-(2-propyl)-5-methyl-1-cyclohexanol (menthol) /Cyclohexanol, 5-methyl-2-(1-methylethyl)-, [1R-(1.alpha.,2.beta.,5.alpha.)]-, Furfural alcohol/2-furanmethanol, 1-phenylethylester acetic acid, Tetradecanoic acid, 1-methylethyl ester, 1,3-diacetyloxypropan-2-yl acetate, 2-hydroxy, hexyl ester benzoic acid, Methyl 2-pentyl-3-oxo-1-cyclopentyl acetate, Methoxy acetic acid, dodecyl ester, Homomenthylsalicylate, 2-ethylhexylsalicylate, 2,4,6-tert-butyl-phenol, Phenyl ethyl alcohol/phenylethanol, 2,6-bis(1,1-dimethylethyl)-4-(1-oxopropyl)phenol, 1-Hexanol, 2-ethyl-</p> <p>2,6,10,15,19,23-hexamethyl-2,6,10,14,18,22-tetracosahexaene (squalene), Dodecanoic acid,</p> |

|        |      |         |    |                                                                                                                                                                                                                                                                                                                                                                                                                                                                                                                                                                                                                                                                                                                                                                                                                                                                                                                                                                                                                                                                                                                                                                                                                                                                                                                                                                                |
|--------|------|---------|----|--------------------------------------------------------------------------------------------------------------------------------------------------------------------------------------------------------------------------------------------------------------------------------------------------------------------------------------------------------------------------------------------------------------------------------------------------------------------------------------------------------------------------------------------------------------------------------------------------------------------------------------------------------------------------------------------------------------------------------------------------------------------------------------------------------------------------------------------------------------------------------------------------------------------------------------------------------------------------------------------------------------------------------------------------------------------------------------------------------------------------------------------------------------------------------------------------------------------------------------------------------------------------------------------------------------------------------------------------------------------------------|
|        |      |         |    | <p>Tetradecanoic acid/Myristic Acid, Hexadecanoic acid/n-hexadecanoic acid, Pentadecanoic acid</p> <p>Tridecanoic acid, 9-hexadecanoic acid, Lactic acid, 1-Butanol, Heptadecanoic acid, Ethyl hexadecanoate/Palmitic acid, ethyl ester, 6-Methyl-3,5-heptadiene-2-one, 2-Cyclopenten-1-one, 2-methyl-, 2-Cyclopenten-1-one, 3-methyl-, Benzothiazole, glycerol/Propane-1,2,3-triol, 2,5-hexanedione, 6-hydroxy-hexan-2-one, 3-hexanol, 2-hexanol, 1,6-heptadien-4-ol, 3-hexene-2,5-diol, 3-methyl-cyclopentanol, 1-methyl-cyclopentanol, 2-methyl-cyclopentanol, 2(5H)-furanone, 3-methyl, 1-methoxy-hexane, Ethyl carbamate, 4-ethyl-morpholine, Lactic acid, methyl ester</p> <p>1-methyl hexyl acetate, Methoxy acetic acid, tetradecyl ester, Hexadecanoic acid, 2-hydroxyethylester, Ethyl (-)-lactate, 4-vinyl imidazole</p>                                                                                                                                                                                                                                                                                                                                                                                                                                                                                                                                            |
| Curran | 2007 | Healthy | 62 | <p>Nonanal, Geranylacetone/6,10-Dimethylundeca-5,9-dien-2-one, Decanal, Pyridine, Tetradecanoic acid, 1-methylethyl ester, Octanal, Benzoic acid/Benzaldehyde, Dodecanal, Linalool/3, 7-dimethyl-1,6-octadien-3-ol, 5-Hepten-2-one, 6-methyl-, Phenol, 3,7-dimethyl-6-octen-1-ol, Furfural alcohol/2-furanmethanol, Phenyl ethyl alcohol/phenylethanol, Tetradecanal, Hexanal, Heptanal, Undecanal, Tetradecane, Pentadecane, Dodecane, Tridecane, 2-Nonenal, (E)-, Heptadecene, Undecane, Hexadecane, Nonane, Tridecanal, Toluene, 2-Decanone, Benzyl alcohol, Furfural/2-Furancarboxyaldehyde, Eicosane, Decanoic acid, Methyl ester, Octanoic acid, Butanal, 2-methyl-, <math>\beta</math>-Pinene/6,6-dimethyl-2-methylene-, (1S)-Bicyclo[3.1.1]heptane, 2-Decenal, (E)-Benzene, 1,3-dimethyl, Benzene, 1,2,3-trimethyl-, n-Octane, Decanoic acid, 1-Octanol/Octanol/Isooctanol, 1,4-dimethylbenzene/xylene, Benzene, 1-ethyl-2-methyl-, Naphthalene, 1-Nonanol, 2-Octenal, (E)-, Cyclohexadecane, Cyclotetradecane, 7-Hexadecenoic acid, methyl ester, Dodecanoic acid, methyl ester, Furancarboxylic acid-methyl ester, Hexadecanoic acid, methyl ester, Hexanedioic acid, dimethyl ester, Propanedioic acid, dimethyl ester, Nonanoic acid, methyl ester, 1-chlorononane, Thiazolidine, Benzene, 1,3,5-trimethyl, Benzene, 1-ethyl-3-methyl-, 1,2,4-Trimethylbenzene</p> |
| Zhang  | 2005 | Healthy | 34 | <p>Nonanal. Decanal, Octanal, Benzoic acid/Benzaldehyde, 3,7-dimethyl-6-octen-1-ol, Phenyl ethyl alcohol/phenylethanol, Tetradecane, Pentadecane, Dodecane, Tridecane, Undecane, Hexadecane, Eicosane, Acetophenone/1-phenyl-ethanone, Linal/<math>\alpha</math>-methyl-<math>\beta</math>-(p-tert-butylphenyl)propanal, Cedrol, 3,7-dimethyl-2,6-octadien-1-ol, 1-Hexanol, 2-ethyl-, Limonene, Pentadecene, <math>\alpha</math>-Pinene, Methyl salicylate, 5-Methyl-2-isopropyl cyclohexanol, 1,3,5,7-Cyclooctene, Camphene, 3-Dodecene, Caryophyllene, Hexadecene, 2-Methyl dodecane</p>                                                                                                                                                                                                                                                                                                                                                                                                                                                                                                                                                                                                                                                                                                                                                                                     |

|           |      |         |    |                                                                                                                                                                                                                                                                                                                                                                                                                                                                                                                                                                                                                                                                                                                                                                                                                                                                                                                                                                                                                                                                                                                                                                                                      |
|-----------|------|---------|----|------------------------------------------------------------------------------------------------------------------------------------------------------------------------------------------------------------------------------------------------------------------------------------------------------------------------------------------------------------------------------------------------------------------------------------------------------------------------------------------------------------------------------------------------------------------------------------------------------------------------------------------------------------------------------------------------------------------------------------------------------------------------------------------------------------------------------------------------------------------------------------------------------------------------------------------------------------------------------------------------------------------------------------------------------------------------------------------------------------------------------------------------------------------------------------------------------|
|           |      |         |    | Cyclopentadecane, 2-Methyl hexadecane, Isobornyl propionate, Tetramethyl thiourea, Diphenyl ether                                                                                                                                                                                                                                                                                                                                                                                                                                                                                                                                                                                                                                                                                                                                                                                                                                                                                                                                                                                                                                                                                                    |
| Curran    | 2005 | Healthy | 46 | Nonanal, Decanal, Octanal, Benzoic acid/Benzaldehyde, Tetradecane, Dodecane, Tridecane, Undecane, $\alpha$ -Pinene, Hexadecene, Pyridine, Tetradecanoic acid, 1-methylethyl ester, 5-Hepten-2-one, 6-methyl-, Phenol, Furfural alcohol/2-furanmethanol, Tetradecanal, Hexanal, Heptanal, Undecanal, 2-Nonenal, (E)-, Heptadecene, Nonane, Toluene, Benzyl alcohol, Furfural/2-Furancarboxyaldehyde, Decanoic acid, methyl ester, Octanoic acid, methyl ester, Naphthalene 7-Hexadecenoic acid, methyl ester, Dodecanoic acid, methyl ester, Furancarboxylic acid-methyl ester, Hexadecanoic acid, methyl ester, Hexanedioic acid, dimethyl ester, Propanedioic acid, dimethyl ester, 1-chlorononane, 1-phenylethylester acetic acid, Dodecanoic acid, Tetradecanoic acid/Myristic Acid, Methyl 9-methyltetradecanoate, 2-Undecanone, 6,10-dimethyl-, Methylpentadecanoic acid, Nonanoic acid, methyl ester, Tridecanoic acid, methyl ester Cyclopentanetridecanoic acid-methyl ester, Hexanoic acid-methyl ester, Undecanoic acid-methyl ester                                                                                                                                                       |
| Haze      | 2001 | Healthy | 22 | Nonanal, Decanal, Octanal, Dodecane, Undecane, Hexanal, Heptanal, 2-Nonenal, (E)-, Nonane 1-Hexanol, 2-ethyl-, 1-Octanol/Octanol/Isooctanol, Acetic acid/Ethanoic acid, 1-Butanol, 4-Methyl-2-pentanone, 1-Hexadecanol, Octadecanol, Butyric acid , 6- methyl-5-heptanone, 1-hexanol, 1-Decanol, Amyl alcohol/1-pentanol, 4-methyl-2-pentene                                                                                                                                                                                                                                                                                                                                                                                                                                                                                                                                                                                                                                                                                                                                                                                                                                                         |
| Meijerink | 2000 | Healthy | 75 | Nonanal, Decanal, Octanal, Hexanal, Heptanal, 1-Octanol/ Octanol/ Isooctanol, Acetic acid/Ethanoic acid, 1-Butanol, 1-Hexadecanol, 1-hexanol, 1-Decanol, amyl alcohol/1-pentanol, Pyridine, 5-Hepten-2-one, 6-methyl-, Furfural alcohol/2-furanmethanol, Benzyl alcohol, Furfural/2-Furancarboxyaldehyde, Phenyl ethyl alcohol/phenylethanol, Geranylacetone/6,10, Dimethylundeca-5,9-dien-2-one, 1-Nonanol, 2-Propanone/Acetone, Hexanoic acid, Butanoic acid, 3-methyl-/Isovaleric acid, Hexanoic acid, 2-ethyl-, Propanoic acid, Butanoic acid, 2-(2-propyl)-5-methyl-1-cyclohexanol (menthol) /Cyclohexanol, 5-methyl-2-(1-methylethyl)-, [1R-(1.alpha.,2.beta.,5.alpha.)]-, 6-Methyl-3,5-heptadiene-2-one, Ethanol/ethyl alcohol, 1-Dodecanol 1H-indole, 2-Propanol, 3-Penten-2-one, 4-methyl-, 3-methyl-1-butanol, ethyl tetradecanoate 1-tetradecanol, 2-Nonanone, Benzonitrile, 3-hydroxy-2-butanone, Cyclohexanone, 1-heptanol 2-methyl-1-butanol, 3,5,5-trimethyl-1-hexanol, 1-methoxy-2-propanol, 3-methyl-2-buten-1-ol 4-methyl-4-penten-2-ol, 3-ethyl-2,2-dimethyloxirane, linalooloxide, linalooloxide A, Nicotine, Ethyl butanoate, Ethyl 2-methylbutanoate, Ethyl 3-methylbutanoate, |

|         |      |         |     |                                                                                                                                                                                                                                                                                                                                                                                                                                                                                                                                                                                                                                                                                                                                                                                                                                                                                                                                                                                                                                                                                                                                                                                                                                                                                                                                                                                                                                                                                                                                                                                                                                                                                                                                                                                                                                                                                                                                                                                                                                                                                                                                                                                                                                                                                                                       |
|---------|------|---------|-----|-----------------------------------------------------------------------------------------------------------------------------------------------------------------------------------------------------------------------------------------------------------------------------------------------------------------------------------------------------------------------------------------------------------------------------------------------------------------------------------------------------------------------------------------------------------------------------------------------------------------------------------------------------------------------------------------------------------------------------------------------------------------------------------------------------------------------------------------------------------------------------------------------------------------------------------------------------------------------------------------------------------------------------------------------------------------------------------------------------------------------------------------------------------------------------------------------------------------------------------------------------------------------------------------------------------------------------------------------------------------------------------------------------------------------------------------------------------------------------------------------------------------------------------------------------------------------------------------------------------------------------------------------------------------------------------------------------------------------------------------------------------------------------------------------------------------------------------------------------------------------------------------------------------------------------------------------------------------------------------------------------------------------------------------------------------------------------------------------------------------------------------------------------------------------------------------------------------------------------------------------------------------------------------------------------------------------|
|         |      |         |     | <p>Ethyl isohexanoate, 1-methoxy-2-propyl acetate, Ethyl hexanoate, Ethyl 4-methylhexanoate, Ethyl heptanoate, Ethyl 4-methylheptanoate, Ethyl octanoate, Ethyl 4-methyloctanoate, Ethyl nonanoate, Ethyl decanoate, Ethyl 4-methyldecanoate, dec-9-enoic acid, ethyl estert, Ethyl undecanoate, Ethyl 4, Methylundecanoate, Ethyl isododecanoate, Ethyl dodecanoate, Ethyl 4-methyl dodecanoate, Ethyl isotridecanoate, Ethyl isotetradecanoate, Ethyl 9-tetradecenoate, Ethyl pentadecanoate, Ethyl 9-hexadecenoate</p>                                                                                                                                                                                                                                                                                                                                                                                                                                                                                                                                                                                                                                                                                                                                                                                                                                                                                                                                                                                                                                                                                                                                                                                                                                                                                                                                                                                                                                                                                                                                                                                                                                                                                                                                                                                             |
| Bernier | 2000 | Healthy | 215 | <p>Nonanal, Decanal, Acetic acid/Ethanoic acid, 1-Decanol, Pyridine, 5-Hepten-2-one, 6-methyl-, Furfural alcohol/2-furanmethanol, Benzyl alcohol, Phenyl ethyl alcohol/phenylethanol, Geranylacetone/6,10-Dimethylundeca-5,9-dien-2-one, Hexanoic acid, Propanoic acid, 6-Methyl-3,5-heptadiene-2-one, 1H-indole, 1-tetradecanol, 4-methyl-4-penten-2-ol, Nonane, 4-methyl-2-pentene, Benzoic acid/Benzaldehyde, Tetradecane, Hexadecene, Tetradecanoic acid, 1-methylethyl ester, Phenol, Heptadecene, Toluene, Octanoic acid, methyl ester, Hexadecanoic acid, methyl ester, Hexanedioic acid, dimethyl ester, 1-chlorononane, Dodecanoic acid, Tetradecanoic acid/Myristic Acid, Methylpentadecanoic acid, Nonanoic acid, methyl ester tridecanoic acid, methyl ester, 3,7-dimethyl-6-octen-1-ol, Pentadecane, Hexadecane, 3,7-dimethyl-2,6-octadien-1-ol, Dodecanal, 2-Decanone, n-Octane, Decanoic acid, 1,4-dimethylbenzene/xylene, Cyclohexadecane, Cyclotetradecane, Thiazolidine, 1-octen-3-ol Octanoic acid, 2,6,10,15,19,23-hexamethyl-2,6,10,14,18,22-tetracosahexaene (squalene), Hexadecanoic acid/n-hexadecanoic acid, Pentadecanoic acid, Tridecanoic acid, Lactic acid, Heptadecanoic acid, Glycerol/Propane-1,2,3-triol, 2-hexadecanol, Ethylbenzene, Decane Nonanoic acid, Tetradecene, Octadecane, Tricosane, Docosane, n-Heptane, Carbon disulfide, Hexane, Benzene, Dimethyl sulfide, 2-Pentanone, 2-Hexanone, 1-Pentene, Furan, 3-methyl-Furan, 2-methyl-, Heptanoic acid, Undecanoic acid, Tridecanol/1-tridecanol, N,N-dimethyl-1-hexadecanamine, Styrene, 2,4-dimethylhexane, Octadecanoic acid, Octadecanoic acid, phenyl ester, Tetradecanoic acid, undecyl ester, Hexanedioic acid, octyl ester cholesta-3,5-diene, 2-methyl dodecanoic acid, Docosanoic acid, Heptanedioic acid, 2- propenoic acid, 2-butenic acid, 2-methyl-2-butenic acid, 3-methyl-2-pentenoic acid, 3-methylpentanoic acid, Methyltridecanoic acid, Methylheptadecanoic acid, Hexanedioic acid, 4-hydroxy-3-methoxybenzoic acid, 9-Hexadecenoic acid, 2-methylhexadecanal, Butanone, 3-, Pentanone, 2-nonen-4-one, 2- butanol, 2-decanol, 2-heptadecanol, 2-methyl-3-pentanol, Ethylene glycol, 2-hexen-1-ol, 4-hexen-1-ol, 1-hexen-3-ol, 1-hepten-3-ol, 2-octen-1-ol, 2-methyl-3, Octenol, Nonenol, Dodecenol,</p> |



|  |  |  |                                                                                                                                                                                                                                                                                                                                                                                                                                                                                                                                                                                                                                                                                                                                                                                                                                                                                                                                                                                                                                                                                                                                                                                                                                                                                                                                                                                                                                                                                                                                                                                                                                                                                                                                                                                                                                                                                                                                                                                                                                                                                                                                                                                                                                                                                                                                                                                                                                                                                                                                                                                                                                        |
|--|--|--|----------------------------------------------------------------------------------------------------------------------------------------------------------------------------------------------------------------------------------------------------------------------------------------------------------------------------------------------------------------------------------------------------------------------------------------------------------------------------------------------------------------------------------------------------------------------------------------------------------------------------------------------------------------------------------------------------------------------------------------------------------------------------------------------------------------------------------------------------------------------------------------------------------------------------------------------------------------------------------------------------------------------------------------------------------------------------------------------------------------------------------------------------------------------------------------------------------------------------------------------------------------------------------------------------------------------------------------------------------------------------------------------------------------------------------------------------------------------------------------------------------------------------------------------------------------------------------------------------------------------------------------------------------------------------------------------------------------------------------------------------------------------------------------------------------------------------------------------------------------------------------------------------------------------------------------------------------------------------------------------------------------------------------------------------------------------------------------------------------------------------------------------------------------------------------------------------------------------------------------------------------------------------------------------------------------------------------------------------------------------------------------------------------------------------------------------------------------------------------------------------------------------------------------------------------------------------------------------------------------------------------------|
|  |  |  | <p>Methyldodecene, 2-methyl-2-dodecene, 3-ethyl-1,4-hexadiene</p> <p>2,6-dimethyl-1-heptene, 2-methyl-1-heptene, 4-ethyl-3-heptene, 2-methyl-1-hexene, 2-methyl-2-undecene, 3-methyl-5-undecene, 4-methyl-4-undecene, 9-octadecene, 2-octene, 3-octene, 4-octene, 3,4-nonadiene, Trimethyl-1,5-heptadiene, 2,7-dimethyl-1-octene, 5-decene, Undecadiene</p> <p>4-nonene, Dimethylpentadiene, Methylheptadecane, Trimethyl-3-methylenehexadecane, Heneicosane, Pentacosane, Menthane, N-menth-6-ene, 2-(2H-benzotriazol-2-yl)-4-methylphenol, 2-butenic acid, butyl ester, Butanoic acid, methyl ester, 13-methylpentadecanoic acid, methyl ester, 14-methylpentadecanoic acid, methyl ester, Octadecenoic acid, methyl ester, Hexadecanoic acid, butyl ester, Tetracosanoic acid, methyl ester</p> <p>pentanedioic acid, ester, Pentanedioic acid, mono(2-ethylhexyl) ester, Heptanedioic acid, dibutyl ester, Hydroxybutanoic acid, ethyl ester, 3-hydroxybenzoic acid, methyl ester, 4-hydroxybenzoic acid, propyl ester, 2-hydroxybenzoic acid, phenylmethyl ester, 2,4-dihydroxy-3,6-dimethylbenzoic acid, 16-methylheptadecanoic acid, methyl ester, Propanamide, N,N-diethyl-3-methylbenzamide (DEET)</p> <p>N,N-bis(2-hydroxyethyl)dodecanamide, N,N-didodecyl formamide, 1,3-butanediamine, N,N-dimethyl-1,2-ethanediamine, N-ethylcyclopentamine, N,N-dimethyl-3-butoxypropylamine, N,N-dimethyl-3-benzyloxypropylamine, N-methyl-N-nitroso-1-dodecanamine, N,N-dimethyl-1-dodecanamine, N,N-dimethyl-1-tridecanamine, N,N-dimethyl-1-tetradecanamine, N,N-dimethyl-1-pentadecanamine, N,N-dimethyl-1-heptadecanamine, N,N-dimethyl-1-octadecanamine</p> <p>methyl iodide, 1-chlorohexane, 1-chloroheptane, 1-chlorododecane, 1-chlorotetradecane, 1-chloropentadecane, 1-chlorohexadecane, 2-methyl-1H-pyrrole, 3-methyl-1H-pyrrole, 3-pyridinamine, 4-pyridinamine, 4-methyl-2-pyridinamine, 2-methylpyridine, 4(1H)-pyridinone, 6-amino-3-pyridine carboxylic acid, 3(1-methyl-2-pyrrolidinyl)pyridine (nicotine), 1,2,3,4-tetrahydroquinoline, 2,3,4-trimethylquinoline, 2-ethylpiperidine, 1-piperidineethanol, 4-piperidinemethanamine, 1-phenyl-3-(1-piperidinyl)-2-buten-1-one, 4,5-dihydro-2-methyl-1H-imidazole, 1,5-dimethyl-1H-pyrazole, pyrazine, 2,6-dimethylpyrazine, trimethylpyrazine, 2-methylisothiazole, Thiomethane, 2-thiopropene, 1-methylthiobutane, 1-thiododecane, 3-methylthietane, 3-(methylthio)-1,2-propanediol, o-(2-butenylthio)phenol, cholest-5-en-3-ol, 4-hydroxybenzoic acid, 3-hydroxy-4-methylbenzaldehyde, 4-phenylmethoxybenzaldehyde, propylbenzene, 4,4'-dimethyl-1,1'-biphenyl</p> |
|--|--|--|----------------------------------------------------------------------------------------------------------------------------------------------------------------------------------------------------------------------------------------------------------------------------------------------------------------------------------------------------------------------------------------------------------------------------------------------------------------------------------------------------------------------------------------------------------------------------------------------------------------------------------------------------------------------------------------------------------------------------------------------------------------------------------------------------------------------------------------------------------------------------------------------------------------------------------------------------------------------------------------------------------------------------------------------------------------------------------------------------------------------------------------------------------------------------------------------------------------------------------------------------------------------------------------------------------------------------------------------------------------------------------------------------------------------------------------------------------------------------------------------------------------------------------------------------------------------------------------------------------------------------------------------------------------------------------------------------------------------------------------------------------------------------------------------------------------------------------------------------------------------------------------------------------------------------------------------------------------------------------------------------------------------------------------------------------------------------------------------------------------------------------------------------------------------------------------------------------------------------------------------------------------------------------------------------------------------------------------------------------------------------------------------------------------------------------------------------------------------------------------------------------------------------------------------------------------------------------------------------------------------------------------|

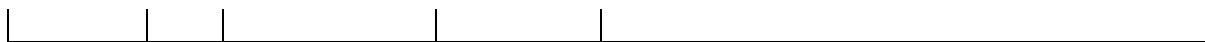

Supplement: s1 [file s1]
